# Supplementary material for: Development of an electrochemical sensor for the determination of antibiotic sulfamethazine in cow milk using graphene oxide decorated with Cu–Ag core–shell nanoparticles
Source: Royal Society of Chemistry journal article supplement (doi:10.1039/d0ay02261f), 2021-01-01
Supplement: d0ay02261f1.pdf [file d0ay02261f1.pdf]

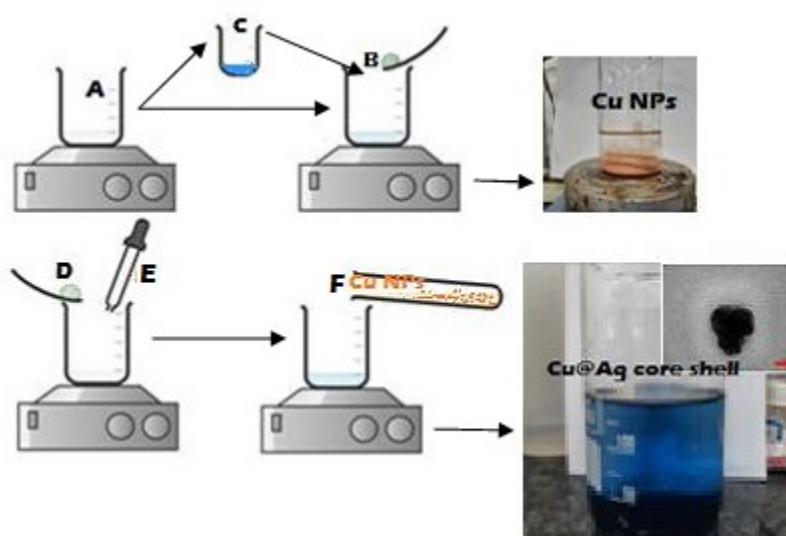

**Figure 1S.** Two steps synthesis of Cu-Ag core shell nanoparticles A) PVP (k25) B) ascorbic acid, C) copper sulfate, D) silver nitrate, E) ammonia solution, F) Cu NPs dispersed in distilled water.

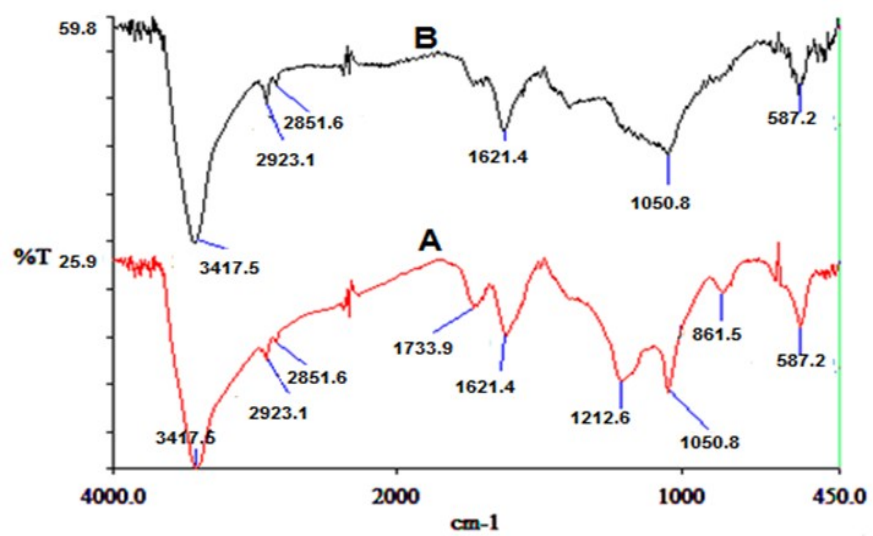

**Figure 2S.** FT-IR spectrum of (A) graphene oxide and (B) Cu-Ag/GO nanocomposite.

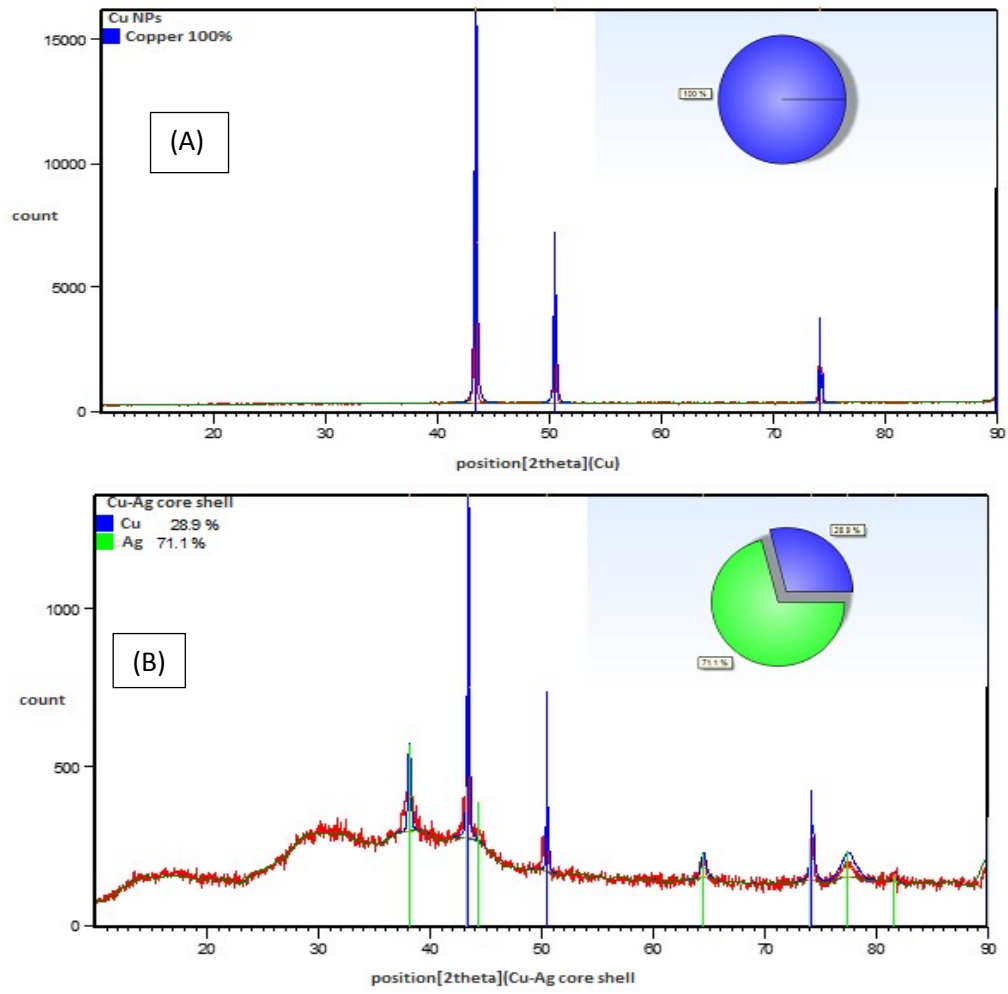

**Figure 3S.** XRD Analysis of (A) Cu-Ag core shell (B) Cu nanoparticles.

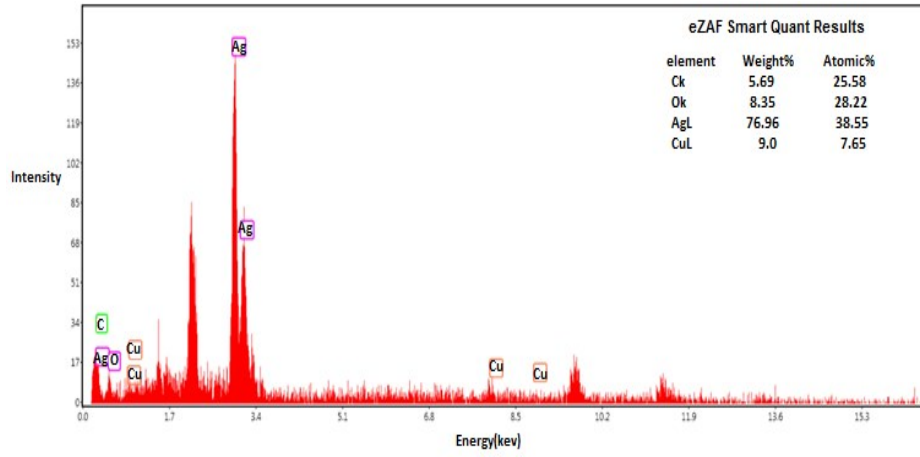

**Figure 4S.** EDS analysis of GO/Cu-Ag core shell nanoparticles.

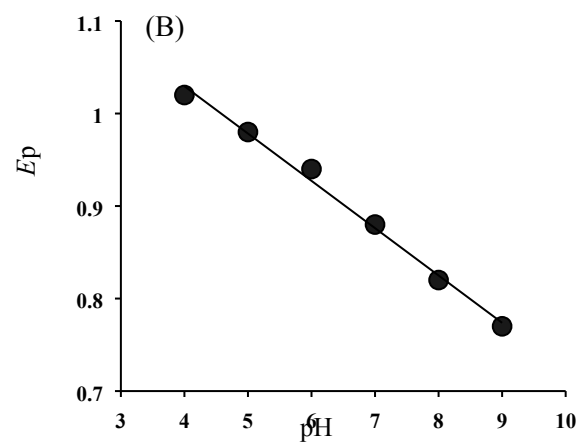

Figure 5S. Plot of oxidation peak potential vs. pH, 400  $\mu$ M SMZ, scan rate 100 mV/s, Cu-Ag/GO/GCE.

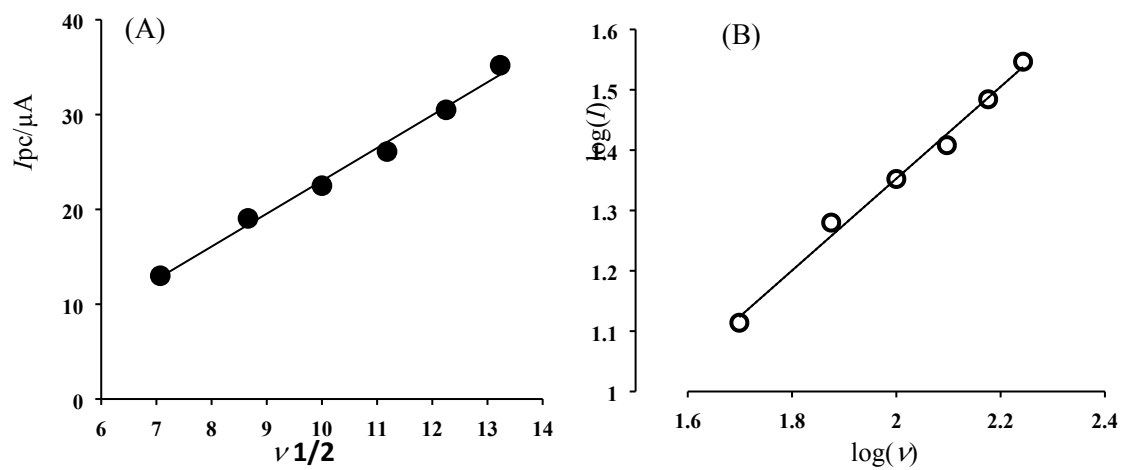

**Figure 6S.** Plot of (A) anodic peak current vs. square root of scan rates and (B)  $\log I$  ( $\mu A$ ) vs.  $\log \nu$ , BR buffer solution (pH=6), 500  $\mu M$  SMZ, Cu-Ag/GO/GCE.

**Table 1S.** Influence of interference species on the signal changes, Scan rate 100 mV/s, Cu-Ag/GO/GCE, BR buffer solution pH=6, SMZ 400  $\mu$ M.

| <b>Interference species</b>                        | <b>Conc.( <math>\mu</math>M)</b> | <b>Signal changes%</b> |
|----------------------------------------------------|----------------------------------|------------------------|
| Vitamin D <sub>3</sub>                             | 100IU                            | -1.59                  |
| lactose                                            | 200                              | 1.35                   |
| glucose                                            | 500                              | 1.14                   |
| L-glutamine                                        | 400                              | -2.74                  |
| L-lysine                                           | 400                              | -1.91                  |
| L-alanine                                          | 400                              | -2.23                  |
| Ca <sup>2+</sup> ,CO <sub>3</sub> <sup>-2</sup>    | 500                              | 1.76                   |
| K <sup>+</sup> , Na <sup>+</sup> , Cl <sup>-</sup> | 500                              | 1.52                   |

**Table 2S.** Determination of sulfamethazine in spiked milk 3% fat, UHT treated and homogenized long life samples, BR buffer pH=6, scan rate 100 mV/s, proposed sensor and HPLC method.

| No. samples | Proposed sensor |           |           |      | HPLC method** |           |       |
|-------------|-----------------|-----------|-----------|------|---------------|-----------|-------|
|             | Added(mg)       | Found(mg) | Recovery% | RSD% | Found(mg)     | Recovery% | RSD%  |
| 1           | 10              | 9.44      | 94.40     | 4.10 | 10.22         | 102.20    | 0.032 |
| 2           | 15              | 14.59     | 97.30     | 1.30 | 14.57         | 97.15     | 0.119 |
| 3           | 20              | 19.80     | 99.00     | 2.42 | 20.53         | 102.65    | 0.054 |

\*No. of measurements n=3, \*\* According to USP 40- NF 35
